# Supplementary material
Source: PubMed Central journal article supplement (PMC6728695)

# Dental Abnormalities Caused by Novel Compound Heterozygous *CTSK* Mutations

Journal of Dental Research  
DSI-DS2  
© International & American Associations  
for Dental Research 2015  
Reprints and permissions:  
sagepub.com/journalsPermissions.nav  
DOI: 10.1177/0022034515573964  
jdr.sagepub.com

Y. Xue<sup>1\*</sup>, L. Wang<sup>2\*</sup>, D. Xia<sup>3</sup>, Q. Li<sup>3</sup>, S. Gao<sup>3</sup>, M. Dong<sup>3</sup>, T. Cai<sup>4</sup>,  
S. Shi<sup>5</sup>, L. He<sup>6</sup>, K. Hu<sup>6</sup>, T. Mao<sup>6</sup>, and X. Duan<sup>1</sup>

## Appendix

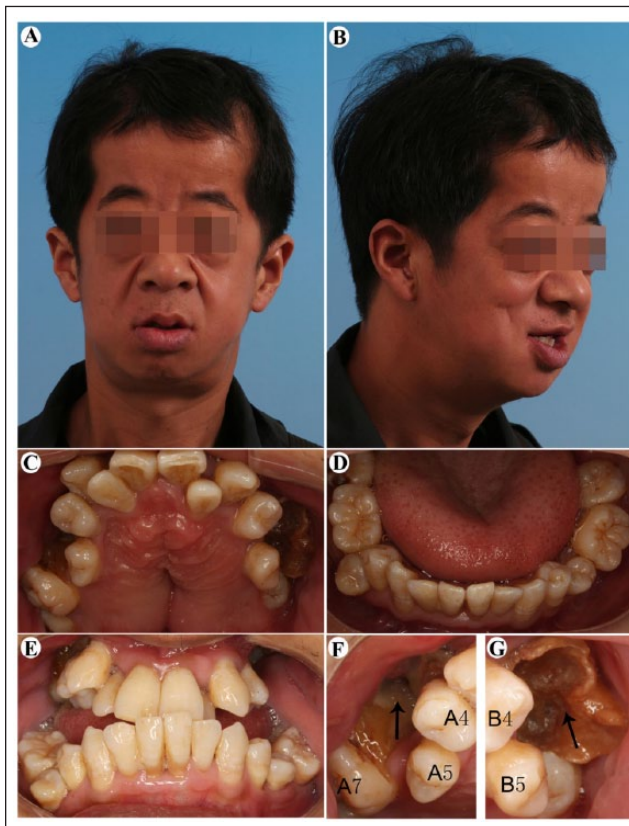

**Appendix Figure I.** Oral and craniofacial manifestations of the patient. The patient displays frontal and parietal bossing, hypoplasia of facial bones, and symmetrical swellings on both sides of the submandibular region in anterior view (A) or lateral view (B). Intraoral features include grooved palate (C), dental crowding in both maxilla (C) and mandible (D), and severe malocclusion (E). The exposed wounds (arrows) in the maxilla are shown in F (the right side) and G (the left side).

<sup>1</sup>State Key Laboratory of Military Stomatology, Department of Oral Biology, Clinic of Oral Rare and Genetic Diseases, School of Stomatology, Fourth Military Medical University, Xi'an, Shaanxi, P. R. China

<sup>2</sup>Department of Molecular Biology, Fourth Military Medical University, Xi'an, Shaanxi, P. R. China

<sup>3</sup>Interdisciplinary Nanoscience Center (iNANO), Aarhus University, Aarhus C, Denmark

<sup>4</sup>Oral Infection and Immunity Branch, National Institutes of Health, Bethesda, MD, USA

<sup>5</sup>Center for Craniofacial Molecular Biology, University of Southern California School of Dentistry, Los Angeles, CA, USA

<sup>6</sup>State Key Laboratory of Military Stomatology, Department of Oral and Maxillofacial Surgery, School of Stomatology, Fourth Military Medical University, Xi'an, Shaanxi, P. R. China

\*Authors contributing equally to this article.

### Corresponding Author:

X. Duan, State Key Laboratory of Military Stomatology, Department of Oral Biology, Clinic of Oral Rare and Genetic Diseases, School of Stomatology, Fourth Military Medical University, 145 West Changle Road, Xi'an 710032, P. R. China.  
Email: xhduan@fmmu.edu.cn

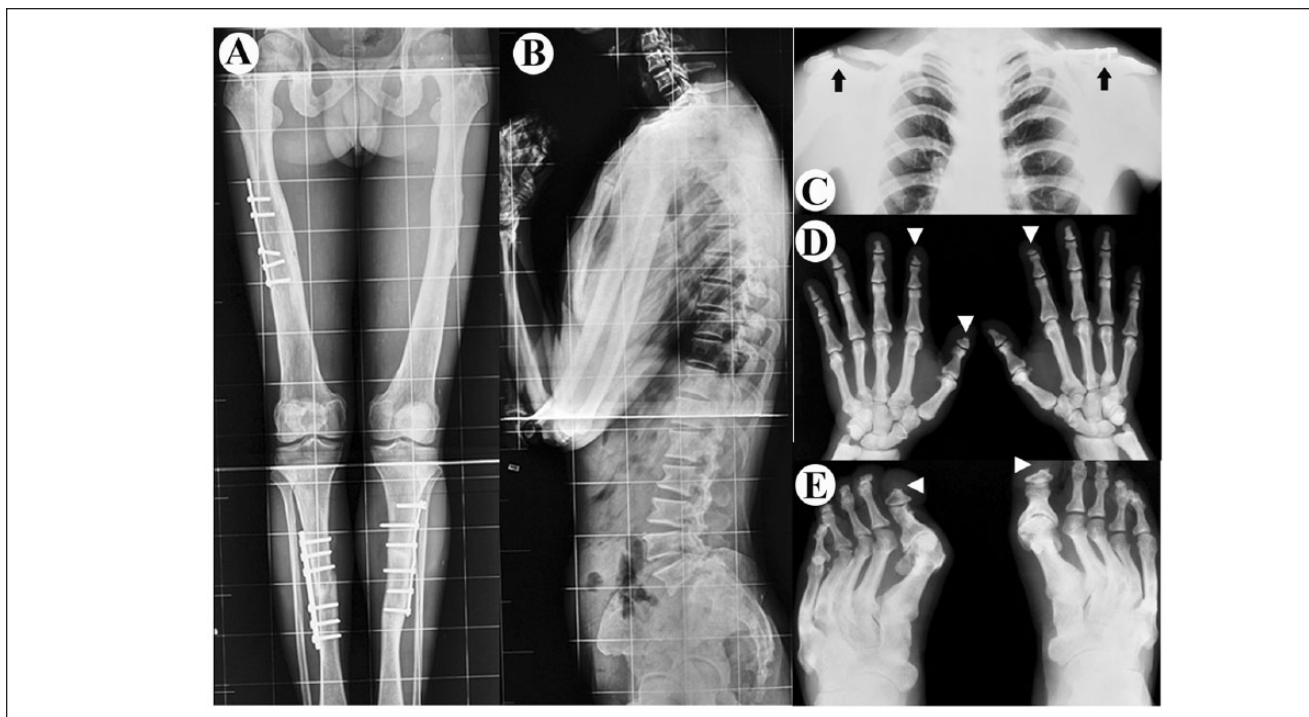

Supplement: DS_10.1177_0022034515573964.pdf [file DS_10.1177_0022034515573964.pdf]
